# Supplementary material
Source: Research Square preprint supplement (doi:10.21203/rs.3.rs-9085231/v1)
Supplement: Supplementary file 1 [file a672b88962eff93a9cc939f7.docx]

**Additional File 3- Flock distribution and size**

| **Species** | **Gender** | **Age** | **Median (Range)** |
| --- | --- | --- | --- |
| Goat | Male | < 6 months | 2 (0 - 58) |
| 6 months – 2 years | 2 (0 - 30) |
| >2 years | 2 (0 - 60) |
| Female | < 6 months | 2 (0 - 25) |
| 6 months – 2 years | 2 (0 - 22) |
| >2 years | 3 (0 - 30) |
| Sheep | Male | < 6 months | 2 (0 - 60) |
| 6 months – 2 years | 2 (0 - 45) |
| >2 years | 2 (0 - 60) |
| Female | < 6 months | 2 (0 - 32) |
| 6 months – 2 years | 3 (0 - 43) |
| >2 years | 4 (0 - 100) |
